# Supplementary material
Source: PubMed Central journal article supplement (PMC2736868)

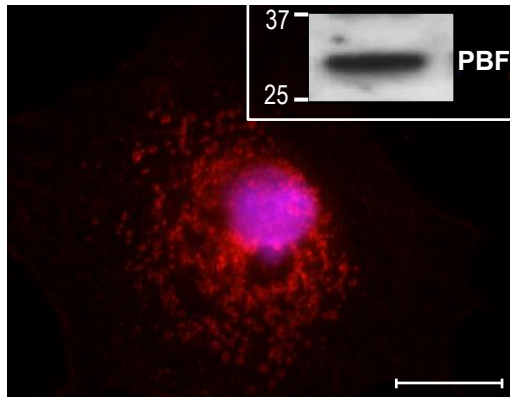

Supplement: supp_122_18_3393__1.pdf [file supp_122_18_3393__1.pdf]

**A**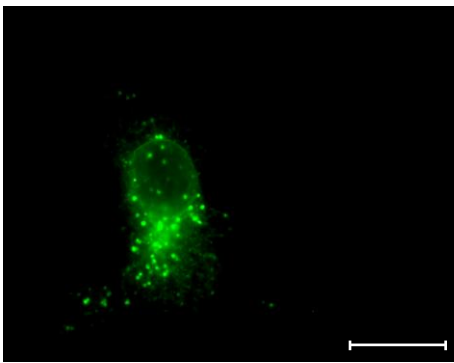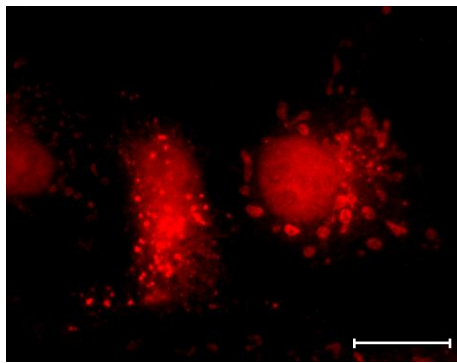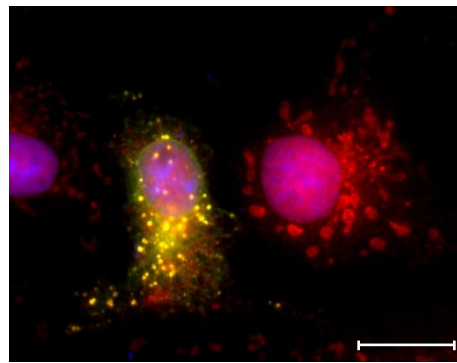**B**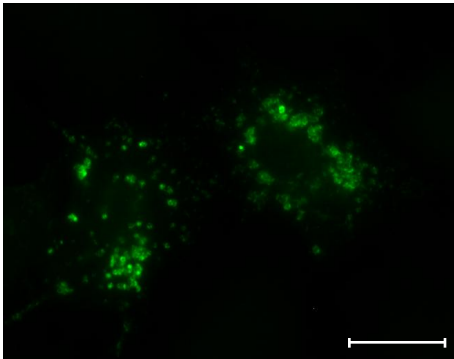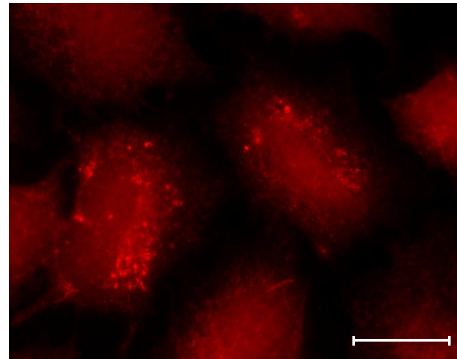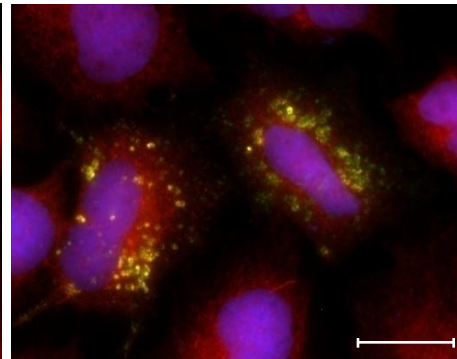

Supplement: supp_122_18_3393__2.pdf [file supp_122_18_3393__2.pdf]

**A**

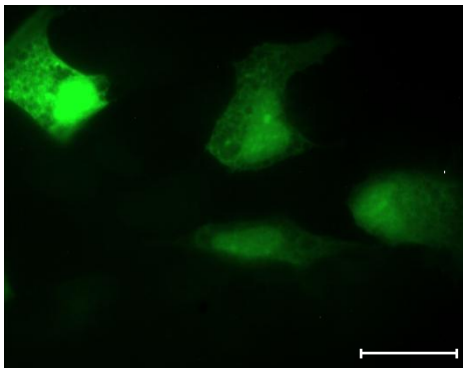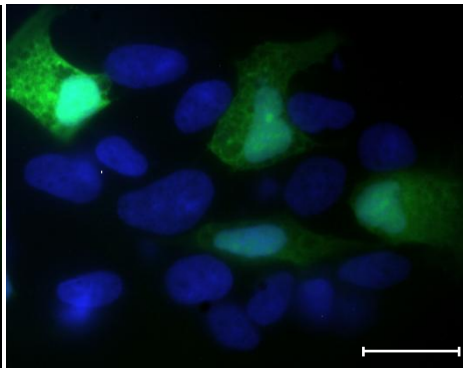

**B**

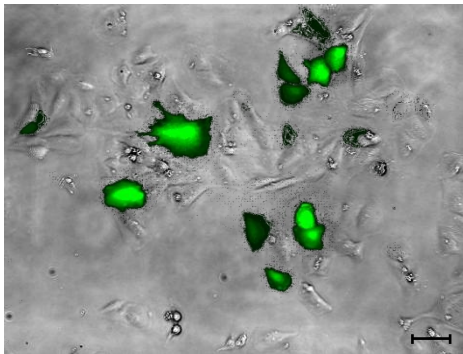

Supplement: supp_122_18_3393__3.pdf [file supp_122_18_3393__3.pdf]
